# Supplementary material for: The ventilatory efficiency slope (VE/VCO₂ slope) as a predictor of postoperative cardiopulmonary complications post lung segmentectomy in high-risk patients?
Source: Research Square preprint supplement (doi:10.21203/rs.3.rs-8502647/v1), 2026-02-11
Supplement: Supplementary file 1 [file e13a165d2141a34cfc113733.docx]

*Supplemental data : Informations about the 8 patients that were not selected for surgery because of a VO2 peak inferior of 10ml/Kg/min*

| Patient | Peak VO2 (ml/kg/min) | VE/VCO2 slope | CPET maximality |
| --- | --- | --- | --- |
| Patient 1 | 9,6 | 32 | Non maximal |
| Patient 2 | 9,2 | 36,5 | Non maximal |
| Patient 3 | 10,0 | 43,5 | Non maximal |
| Patient 4 | 7,5 | 65 | Non maximal |
| Patient 5 | 9,8 | 35,2 | Non maximal |
| Patient 6 | 9,9 | 42,6 | Non maximal |
| Patient 7 | 8,5 | 35,9 | Non maximal |
| Patient 8 | 9,5 | 40 | Non maximal |
